# Supplementary material for: Risk communication and adaptive behaviour in flood-prone areas of Austria: A Q-methodology study on opinions of affected homeowners
Source: PLOS journal article supplement (doi:10.1371/journal.pone.0233551), 2020-05-29
Supplement: S3 (10.1371/journal.pone.0233551.s003) [file journal.pone.0233551.s003]

**S4 Table. Cribsheet system used to compare the factor scores of each statement in factors 1 to 3.**

## Factor 1

| Statement                                                                                                                                 | Highest ranked at +5 | Factor 1 | Factor 2 | Factor 3 |
|-------------------------------------------------------------------------------------------------------------------------------------------|----------------------|----------|----------|----------|
| 2 Another flood could affect me in the near future.                                                                                       |                      | 5        | -3       | -3       |
| 28 I have experienced damages on my home caused by floods.                                                                                |                      | 5        | 5        | 1        |
| 51 Citizens should be involved in the decision-making concerning flood protection in the area.                                            |                      | 5        | 4        | 5        |
| <b>Lowest ranked at -5</b>                                                                                                                |                      |          |          |          |
| 31 There will most probably not occur a flood in the next 10 years in this community.                                                     |                      | -5       | -4       | 0        |
| 33 Thanks to existing protection measures, there is no residual risk in this area.                                                        |                      | -5       | -3       | 0        |
| 35 In case of a flood, I can rely on the support by the government                                                                        |                      | -5       | -3       | -4       |
| <b>Ranked higher in Factor 1 than in other factors</b>                                                                                    |                      |          |          |          |
| 7 Existing information about floods in this area is very difficult to understand.                                                         |                      | -2       | -5       | -3       |
| 10 Implementing watertight cellar windows is an effective measure to decrease the cost of damages on my home by a flood.                  |                      | 4        | 4        | -2       |
| 15 I think that damages by floods could be decreased if there were less areas paved.                                                      |                      | 2        | 1        | 0        |
| 17 If protective measures would be subsidized, more people would implement these.                                                         |                      | 3        | 3        | 0        |
| 18 There are not more floods, there is just more reporting in the media.                                                                  |                      | -3       | -4       | -4       |
| 19 Flooding is not as big of a problem, as the media makes of it.                                                                         |                      | -3       | -4       | -5       |
| 23 I have more important problems than floods.                                                                                            |                      | -2       | -2       | -5       |
| 24 I am interested in learning more about the floods.                                                                                     |                      | -1       | -3       | -1       |
| 36 Politicians should be more involved with the needs of people concerning floods.                                                        |                      | 3        | 0        | 3        |
| 40 I have been in contact with people responsible, concerning protection measures.                                                        |                      | -1       | -1       | -4       |
| 41 I talk to my neighbours about their flood experience.                                                                                  |                      | 4        | 0        | -1       |
| 42 I can rely on the help of my neighbours in case of a flood event.                                                                      |                      | 4        | 1        | 2        |
| 43 I think there is a lack of communication between experts and residents.                                                                |                      | 2        | -2       | -1       |
| 46 I don't see the need to implement measures at my house, as my neighbours aren't either.                                                |                      | -4       | -4       | -5       |
| 50 I am responsible for my own protection against flood hazards.                                                                          |                      | 3        | 1        | 0        |
| <b>Ranked lower in Factor 1 than in other factors</b>                                                                                     |                      |          |          |          |
| 1 I know where to find information about the flood risk of my property.                                                                   |                      | -2       | 3        | 2        |
| 3 If I don't live in a high risk area (red zone) there is no need to implement measures on my house.                                      |                      | -3       | -2       | -2       |
| 4 There is enough information available on floods.                                                                                        |                      | -4       | 2        | -1       |
| 11 I have used temporary barriers (sand sacks, stop logs, etc.) in the past to keep flood water entering my home.                         |                      | 2        | 2        | 4        |
| 16 If the costs of different mitigation measures against floods would be more transparent, I would be more willing to implement measures. |                      | -1       | -1       | 1        |
| 20 The view and access to a waterbody is more important to me than a protective wall.                                                     |                      | -4       | -1       | -4       |
| 22 Natural hazards are beyond my personal abilities to act.                                                                               |                      | -3       | -1       | -1       |
| 25 I am worried about the effects of climate change in my community.                                                                      |                      | 0        | 2        | 3        |
| 26 I believe the damages caused by floods have risen in my community over the last decade.                                                |                      | 1        | 1        | 3        |
| 27 Flood catastrophes are man-made.                                                                                                       |                      | 0        | 0        | 4        |
| 29 Weather forecasts are very useful for determining upcoming flood events.                                                               |                      | 1        | 3        | 1        |

|                                                                   |                                                                                                        |    |    |    |
|-------------------------------------------------------------------|--------------------------------------------------------------------------------------------------------|----|----|----|
| 30                                                                | I use the hazard zone maps provided by the government to evaluate my flood risk.                       | -2 | 0  | 2  |
| 32                                                                | Current safety measures implemented by the government in this community provide sufficient protection. | -4 | -2 | 0  |
| 38                                                                | Personal information given by an expert about flood risks is reliable.                                 | -1 | 0  | 4  |
| 39                                                                | I want to get information about floods through a website.                                              | -1 | 0  | 0  |
| 44                                                                | My neighbours have had damages by floods.                                                              | 3  | 4  | 4  |
| 47                                                                | I want to know if my property is at risk of floods.                                                    | 0  | 1  | 2  |
| 48                                                                | A guide on possible protective measures would be helpful.                                              | 1  | 1  | 5  |
| <b>Neither higher nor lower in Factor 1 than in other factors</b> |                                                                                                        |    |    |    |
| 5                                                                 | I know the distance to the next water body, which could be at risk of overflowing.                     | 2  | 4  | 1  |
| 6                                                                 | Flood probabilities in Austria are difficult to understand.                                            | 0  | -5 | 1  |
| 8                                                                 | I know where to get protection measures for my house.                                                  | 0  | 3  | -3 |
| 9                                                                 | I know how to implement protection measures on my house.                                               | 1  | 5  | -3 |
| 12                                                                | There are no protective measures which I can implement on my house.                                    | -2 | -2 | -2 |
| 13                                                                | Private protection measures are too expensive.                                                         | 0  | -5 | 1  |
| 14                                                                | I know which materials were used to build my house.                                                    | 4  | 5  | 3  |
| 21                                                                | The effects of flood are uncontrollable.                                                               | -1 | -1 | -1 |
| 34                                                                | The government should take care of the flood risk.                                                     | 2  | 0  | 5  |
| 37                                                                | I am willing to pay for expert advice on flood protection measures on my home.                         | 1  | 2  | -2 |
| 45                                                                | My neighbours have implemented protective measures.                                                    | 1  | -1 | 2  |
| 49                                                                | I can properly prepare my house for a possible flood event.                                            | 0  | 2  | -2 |

## Factor 2

| Statement                                                                                                                                 | Highest ranked at +5 | Factor 2 | Factor 1 | Factor 3 |
|-------------------------------------------------------------------------------------------------------------------------------------------|----------------------|----------|----------|----------|
| 9 I know how to implement protection measures on my house.                                                                                |                      | 5        | 1        | -3       |
| 14 I know which materials were used to build my house.                                                                                    |                      | 5        | 4        | 3        |
| 28 I have experienced damages on my home caused by floods.                                                                                |                      | 5        | 5        | 1        |
| <b>Lowest ranked at -5</b>                                                                                                                |                      |          |          |          |
| 6 Flood probabilities in Austria are difficult to understand.                                                                             |                      | -5       | 0        | 1        |
| 7 Existing information about floods in this area is very difficult to understand.                                                         |                      | -5       | -2       | -3       |
| 13 Private protection measures are too expensive.                                                                                         |                      | -5       | 0        | 1        |
| <b>Ranked higher in Factor 2 than in other factors</b>                                                                                    |                      |          |          |          |
| 1 I know where to find information about the flood risk of my property.                                                                   |                      | 3        | -2       | 2        |
| 4 There is enough information available on floods.                                                                                        |                      | 2        | -4       | -1       |
| 5 I know the distance to the next water body, which could be at risk of overflowing.                                                      |                      | 4        | 2        | 1        |
| 8 I know where to get protection measures for my house.                                                                                   |                      | 3        | 0        | -3       |
| 10 Implementing watertight cellar windows is an effective measure to decrease the cost of damages on my home by a flood.                  |                      | 4        | 4        | -2       |
| 17 If protective measures would be subsidized, more people would implement these.                                                         |                      | 3        | 3        | 0        |
| 20 The view and access to a waterbody is more important to me than a protective wall.                                                     |                      | -1       | -4       | -4       |
| 22 Natural hazards are beyond my personal abilities to act.                                                                               |                      | -1       | -3       | -1       |
| 23 I have more important problems than floods.                                                                                            |                      | -2       | -2       | -5       |
| 29 Weather forecasts are very useful for determining upcoming flood events.                                                               |                      | 3        | 1        | 1        |
| 35 In case of a flood, I can rely on the support by the government                                                                        |                      | -3       | -5       | -4       |
| 37 I am willing to pay for expert advice on flood protection measures on my home.                                                         |                      | 2        | 1        | -2       |
| 39 I want to get information about floods through a website.                                                                              |                      | 0        | -1       | 0        |
| 40 I have been in contact with people responsible, concerning protection measures.                                                        |                      | -1       | -1       | -4       |
| 44 My neighbours have had damages by floods.                                                                                              |                      | 4        | 3        | 4        |
| 49 I can properly prepare my house for a possible flood event.                                                                            |                      | 2        | 0        | -2       |
| <b>Ranked lower in Factor 2 than in other factors</b>                                                                                     |                      |          |          |          |
| 2 Another flood could affect me in the near future.                                                                                       |                      | -3       | 5        | -3       |
| 3 If I don't live in a high risk area (red zone) there is no need to implement measures on my house.                                      |                      | -2       | -3       | -2       |
| 11 I have used temporary barriers (sand sacks, stop logs, etc.) in the past to keep flood water entering my home.                         |                      | 2        | 2        | 4        |
| 16 If the costs of different mitigation measures against floods would be more transparent, I would be more willing to implement measures. |                      | -1       | -1       | 1        |
| 18 There are not more floods, there is just more reporting in the media.                                                                  |                      | -4       | -3       | -4       |
| 24 I am interested in learning more about the floods.                                                                                     |                      | -3       | -1       | -1       |
| 26 I believe the damages caused by floods have risen in my community over the last decade.                                                |                      | 1        | 1        | 3        |
| 27 Flood catastrophes are man-made.                                                                                                       |                      | 0        | 0        | 4        |
| 34 The government should take care of the flood risk.                                                                                     |                      | 0        | 2        | 5        |
| 36 Politicians should be more involved with the needs of people concerning floods.                                                        |                      | 0        | 3        | 3        |
| 42 I can rely on the help of my neighbours in case of a flood event.                                                                      |                      | 1        | 4        | 2        |

|                                                                   |                                                                                                        |    |    |    |
|-------------------------------------------------------------------|--------------------------------------------------------------------------------------------------------|----|----|----|
| 43                                                                | I think there is a lack of communication between experts and residents.                                | -2 | 2  | -1 |
| 45                                                                | My neighbours have implemented protective measures.                                                    | -1 | 1  | 2  |
| 46                                                                | I don't see the need to implement measures at my house, as my neighbours aren't either.                | -4 | -4 | -5 |
| 48                                                                | A guide on possible protective measures would be helpful.                                              | 1  | 1  | 5  |
| 51                                                                | Citizens should be involved in the decision-making concerning flood protection in the area.            | 4  | 5  | 5  |
| <b>Neither higher nor lower in Factor 2 than in other factors</b> |                                                                                                        |    |    |    |
| 12                                                                | There are no protective measures which I can implement on my house.                                    | -2 | -2 | -2 |
| 15                                                                | I think that damages by floods could be decreased if there were less areas paved.                      | 1  | 2  | 0  |
| 19                                                                | Flooding is not as big of a problem, as the media makes of it.                                         | -4 | -3 | -5 |
| 21                                                                | The effects of flood are uncontrollable.                                                               | -1 | -1 | -1 |
| 25                                                                | I am worried about the effects of climate change in my community.                                      | 2  | 0  | 3  |
| 30                                                                | I use the hazard zone maps provided by the government to evaluate my flood risk.                       | 0  | -2 | 2  |
| 31                                                                | There will most probably not occur a flood in the next 10 years in this community.                     | -4 | -5 | 0  |
| 32                                                                | Current safety measures implemented by the government in this community provide sufficient protection. | -2 | -4 | 0  |
| 33                                                                | Thanks to existing protection measures, there is no residual risk in this area.                        | -3 | -5 | 0  |
| 38                                                                | Personal information given by an expert about flood risks is reliable.                                 | 0  | -1 | 4  |
| 41                                                                | I talk to my neighbours about their flood experience.                                                  | 0  | 4  | -1 |
| 47                                                                | I want to know if my property is at risk of floods.                                                    | 1  | 0  | 2  |
| 50                                                                | I am responsible for my own protection against flood hazards.                                          | 1  | 3  | 0  |

### Factor 3

| Statement                                                                                                                                 | Highest ranked at +5 | Factor 3 | Factor 1 | Factor 2 |
|-------------------------------------------------------------------------------------------------------------------------------------------|----------------------|----------|----------|----------|
| 34 The government should take care of the flood risk.                                                                                     |                      | 5        | 2        | 0        |
| 48 A guide on possible protective measures would be helpful.                                                                              |                      | 5        | 1        | 1        |
| 51 Citizens should be involved in the decision-making concerning flood protection in the area.                                            |                      | 5        | 5        | 4        |
| <b>Lowest ranked at -5</b>                                                                                                                |                      |          |          |          |
| 19 Flooding is not as big of a problem, as the media makes of it.                                                                         |                      | -5       | -3       | -4       |
| 23 I have more important problems than floods.                                                                                            |                      | -5       | -2       | -2       |
| 46 I don't see the need to implement measures at my house, as my neighbours aren't either.                                                |                      | -5       | -4       | -4       |
| <b>Ranked higher in Factor 3 than in other factors</b>                                                                                    |                      |          |          |          |
| 3 If I don't live in a high risk area (red zone) there is no need to implement measures on my house.                                      |                      | -2       | -3       | -2       |
| 6 Flood probabilities in Austria are difficult to understand.                                                                             |                      | 1        | 0        | -5       |
| 11 I have used temporary barriers (sand sacks, stop logs, etc.) in the past to keep flood water entering my home.                         |                      | 4        | 2        | 2        |
| 13 Private protection measures are too expensive.                                                                                         |                      | 1        | 0        | -5       |
| 16 If the costs of different mitigation measures against floods would be more transparent, I would be more willing to implement measures. |                      | 1        | -1       | -1       |
| 22 Natural hazards are beyond my personal abilities to act.                                                                               |                      | -1       | -3       | -1       |
| 24 I am interested in learning more about the floods.                                                                                     |                      | -1       | -1       | -3       |
| 25 I am worried about the effects of climate change in my community.                                                                      |                      | 3        | 0        | 2        |
| 26 I believe the damages caused by floods have risen in my community over the last decade.                                                |                      | 3        | 1        | 1        |
| 27 Flood catastrophes are man-made.                                                                                                       |                      | 4        | 0        | 0        |
| 31 There will most probably not occur a flood in the next 10 years in this community.                                                     |                      | 0        | -5       | -4       |
| 32 Current safety measures implemented by the government in this community provide sufficient protection.                                 |                      | 0        | -4       | -2       |
| 33 Thanks to existing protection measures, there is no residual risk in this area.                                                        |                      | 0        | -5       | -3       |
| 36 Politicians should be more involved with the needs of people concerning floods.                                                        |                      | 3        | 3        | 0        |
| 38 Personal information given by an expert about flood risks is reliable.                                                                 |                      | 4        | -1       | 0        |
| 39 I want to get information about floods through a website.                                                                              |                      | 0        | -1       | 0        |
| 44 My neighbours have had damages by floods.                                                                                              |                      | 4        | 3        | 4        |
| 45 My neighbours have implemented protective measures.                                                                                    |                      | 2        | 1        | -1       |
| 47 I want to know if my property is at risk of floods.                                                                                    |                      | 2        | 0        | 1        |
| <b>Ranked lower in Factor 3 than in other factors</b>                                                                                     |                      |          |          |          |
| 2 Another flood could affect me in the near future.                                                                                       |                      | -3       | 5        | -3       |
| 5 I know the distance to the next water body, which could be at risk of overflowing.                                                      |                      | 1        | 2        | 4        |
| 8 I know where to get protection measures for my house.                                                                                   |                      | -3       | 0        | 3        |
| 9 I know how to implement protection measures on my house.                                                                                |                      | -3       | 1        | 5        |
| 10 Implementing watertight cellar windows is an effective measure to decrease the cost of damages on my home by a flood.                  |                      | -2       | 4        | 4        |
| 14 I know which materials were used to build my house.                                                                                    |                      | 3        | 4        | 5        |
| 15 I think that damages by floods could be decreased if there were less areas paved.                                                      |                      | 0        | 2        | 1        |
| 17 If protective measures would be subsidized, more people would implement these.                                                         |                      | 0        | 3        | 3        |
| 18 There are not more floods, there is just more reporting in the media.                                                                  |                      | -4       | -3       | -4       |
| 20 The view and access to a waterbody is more important to me than a protective wall.                                                     |                      | -4       | -4       | -1       |

|                                                                   |                                                                                  |    |    |    |
|-------------------------------------------------------------------|----------------------------------------------------------------------------------|----|----|----|
| 28                                                                | I have experienced damages on my home caused by floods.                          | 1  | 5  | 5  |
| 29                                                                | Weather forecasts are very useful for determining upcoming flood events.         | 1  | 1  | 3  |
| 37                                                                | I am willing to pay for expert advice on flood protection measures on my home.   | -2 | 1  | 2  |
| 40                                                                | I have been in contact with people responsible, concerning protection measures.  | -4 | -1 | -1 |
| 41                                                                | I talk to my neighbours about their flood experience.                            | -1 | 4  | 0  |
| 49                                                                | I can properly prepare my house for a possible flood event.                      | -2 | 0  | 2  |
| 50                                                                | I am responsible for my own protection against flood hazards.                    | 0  | 3  | 1  |
| <b>Neither higher nor lower in Factor 3 than in other factors</b> |                                                                                  |    |    |    |
| 1                                                                 | I know where to find information about the flood risk of my property.            | 2  | -2 | 3  |
| 4                                                                 | There is enough information available on floods.                                 | -1 | -4 | 2  |
| 7                                                                 | Existing information about floods in this area is very difficult to understand.  | -3 | -2 | -5 |
| 12                                                                | There are no protective measures which I can implement on my house.              | -2 | -2 | -2 |
| 21                                                                | The effects of flood are uncontrollable.                                         | -1 | -1 | -1 |
| 30                                                                | I use the hazard zone maps provided by the government to evaluate my flood risk. | 2  | -2 | 0  |
| 35                                                                | In case of a flood, I can rely on the support by the government                  | -4 | -5 | -3 |
| 42                                                                | I can rely on the help of my neighbours in case of a flood event.                | 2  | 4  | 1  |
| 43                                                                | I think there is a lack of communication between experts and residents.          | -1 | 2  | -2 |
